# Supplementary material for: A general synthesis of mesoporous metal oxides with well-dispersed metal nanoparticles via a versatile sol–gel process
Source: Royal Society of Chemistry journal article supplement (doi:10.1039/c3ta00570d), 2013-01-01
Supplement: c3ta00570d.pdf [file c3ta00570d.pdf]

## Electronic Supplementary Information

### A General Synthesis of Mesoporous Metal Oxides with Well-dispersed Metal Nanoparticles via a Versatile Sol-Gel Process

Juanjuan Liu, Shihui Zou, Sha Li, Xiaofeng Liao, Yejiang Hong, Liping Xiao and Jie Fan\*

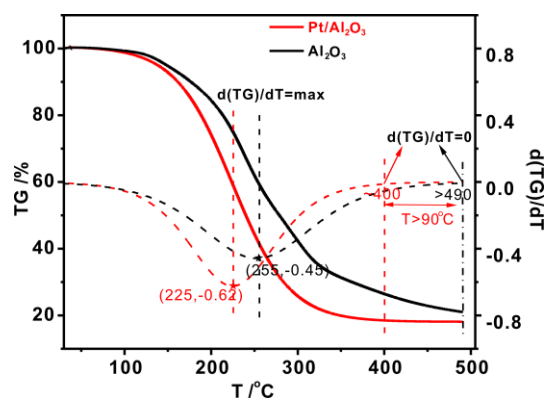

**Figure S1.** TG analysis and fitting curves of the synthesized membranes (not calcined at 400°C in the muffle furnace) under air flow.

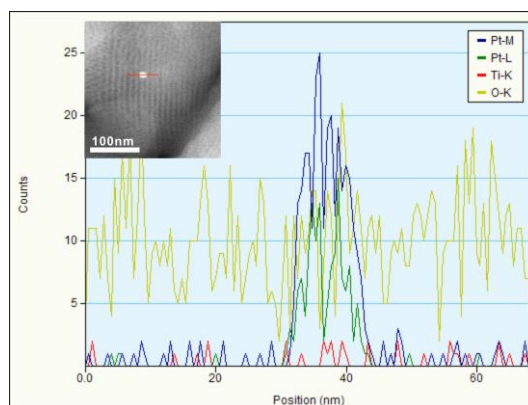

**Figure S2.** Characterization of 0.7wt% Pt/TiO<sub>2</sub> elemental distribution by STEM-EDX line scanning technique. Inset shows analyzed area and direction analysis. Pt-M, Pt-L, Ti-K and O-K refer to the M, L, K electron shells of the Pt, Ti, O atoms.

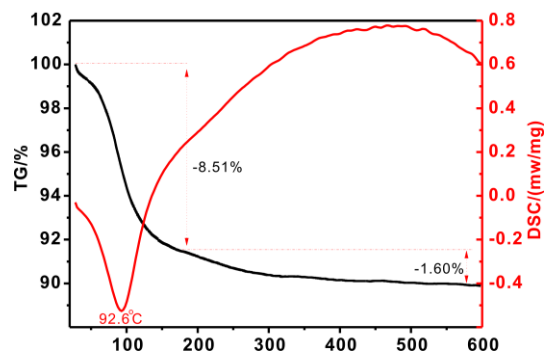

**Figure S3.** TG-DSC analyses of 0.7wt% Pt/TiO<sub>2</sub> sample calcined at 350°C.

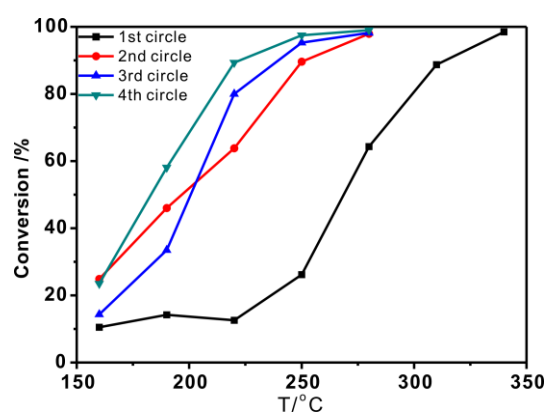

**Figure S4.** Cycle curves of 0.7wt% Pt/TiO<sub>2</sub> catalytic activity on the n-hexane combustion.

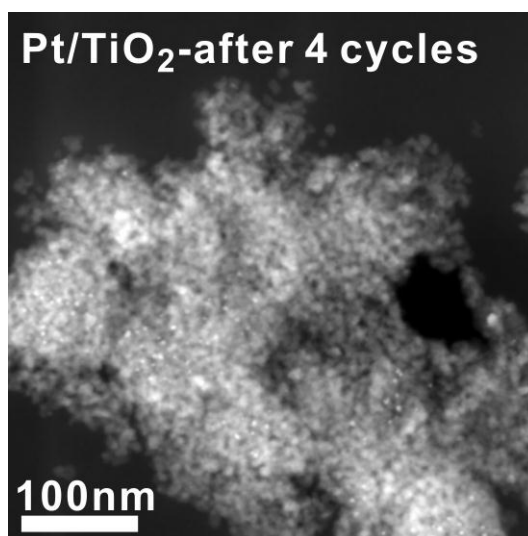

**Figure S5.** The STEM image of 0.7wt% Pt/TiO<sub>2</sub> after 4 cycles on the n-hexane combustion.

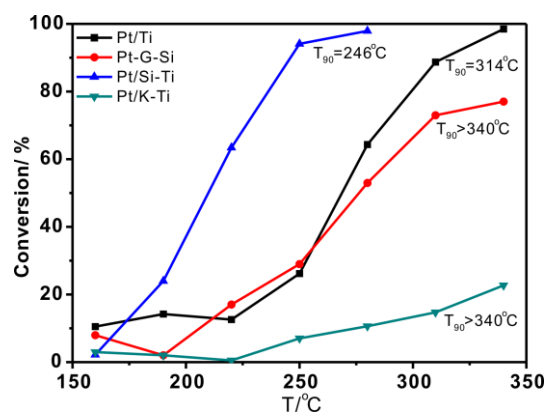

**Figure S6.** The catalytic activities of PtNPs on different supports on the n-hexane combustion.
